# Supplementary material for: Insights into the synergistic effect of multi-walled carbon nanotube decorated Mo-doped CoP2 hybrid electrocatalysts toward efficient and durable overall water splitting
Source: Royal Society of Chemistry journal article supplement (doi:10.1039/d0ta06275h), 2020-01-01
Supplement: d0ta06275h1.pdf [file d0ta06275h1.pdf]

## Supporting information

### Insights into the synergistic effect of multi-walled carbon nanotubes decorated Mo-doped MoP<sub>2</sub> hybrid electrocatalysts toward efficient and durable overall water splitting

Aijian Wang<sup>\*,a</sup>, Xiaodong Chen<sup>a</sup>, Laixiang Cheng<sup>a</sup>, Xiaoliang Shen<sup>a</sup>, Weihua Zhu<sup>\*,a</sup>,  
Longhua Li<sup>a</sup>, Jingyu Pang<sup>b</sup>

<sup>a</sup> School of Chemistry & Chemical Engineering, Jiangsu University, Zhenjiang 212013, P.R. China

<sup>b</sup> Key Laboratory of Polyoxometalate Chemistry of Henan Province, Institute of Molecular and Crystal Engineering, Henan University, Kaifeng 475004, PR China

#### Methods

The present first principle DFT calculations are performed by Vienna Ab initio Simulation Package(VASP) [1] with the projector augmented wave (PAW) method [2]. The exchange-functional is treated using the generalized gradient approximation (GGA) of Perdew-Burke-Ernzerhof (PBE) [3] functional. The cut-off energy of the plane-wave basis is set at 500 eV for optimize calculations of atoms and cell optimization. The vacuum spacing in a direction perpendicular to the plane of the catalyst is at least 15 Å. The Brillouin zone integration is performed using 3×3×1 Monkhorst-Pack k-point sampling for a primitive cell [4]. The self-consistent calculations apply a convergence energy threshold of 10<sup>-5</sup> eV. The equilibrium lattice constants are optimized with maximum stress on each atom within 0.05 eV/Å. The Hubbard *U* (DFT+*U*) corrections for 3d transition metal by setting according to the literature [4]. The OER reaction is considered , as below:

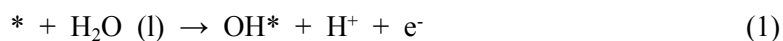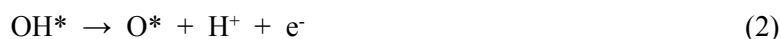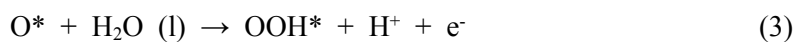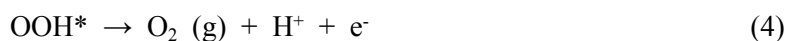

where \* is an adsorption site on catalysts. l and g is liquid and gas phases, respectively. Therefore, the  $\Delta G$  for each step can be calculated by:

$$\begin{aligned}
\Delta G_1 &= G(\text{OH}^*) + G(\text{H}^+ + \text{e}^-) - G(\text{H}_2\text{O}) - G(*) \\
&= \{\Delta G_{\text{OH}^*} + G(*) + [G(\text{H}_2\text{O}) - 1/2G(\text{H}_2)]\} + 1/2G(\text{H}_2) - G(\text{H}_2\text{O}) - G(*) \\
&= \Delta G_{\text{OH}^*} \\
\Delta G_2 &= G(\text{O}^*) + G(\text{H}^+ + \text{e}^-) - G(\text{OH}^*) \\
&= \{\Delta G_{\text{O}^*} + G(*) + [G(\text{H}_2\text{O}) - G(\text{H}_2)]\} + 1/2G(\text{H}_2) - \{\Delta G_{\text{OH}^*} + G(*) + [G(\text{H}_2\text{O}) - 1/2G(\text{H}_2)]\} \\
&= \Delta G_{\text{O}^*} - \Delta G_{\text{OH}^*} \\
\Delta G_3 &= G(\text{OOH}^*) + G(\text{H}^+ + \text{e}^-) - G(\text{O}^*) - G(\text{H}_2\text{O}) \\
&= \{\Delta G_{\text{OOH}^*} + G(*) + [2G(\text{H}_2\text{O}) - 3/2G(\text{H}_2)]\} + 1/2G(\text{H}_2) - \{\Delta G_{\text{O}^*} + G(*) + [G(\text{H}_2\text{O}) - 1/2G(\text{H}_2)]\} - G(\text{H}_2\text{O}) \\
&= \Delta G_{\text{OOH}^*} - \Delta G_{\text{O}^*} \\
\Delta G_4 &= G(\text{O}_2) + G(\text{H}^+ + \text{e}^-) - G(\text{OOH}^*) \\
&= \{4.92 + 2G(\text{H}_2\text{O}) - 2G(\text{H}_2)\} + 1/2G(\text{H}_2) - \{\Delta G_{\text{OOH}^*} + G(*) + [2G(\text{H}_2\text{O}) - 3/2G(\text{H}_2)]\} \\
&= 4.92 - \Delta G_{\text{OOH}^*}
\end{aligned}$$

Then the free energies can be obtained by including the zero point energy (ZPE) and the entropy (S) corrections in equation  $G = E_{\text{ads}} - E_{\text{ZPE}} - TS$ , The  $E_{\text{ZPE}}$  could be obtained from the calculation of vibrational frequencies for the adsorbed species.

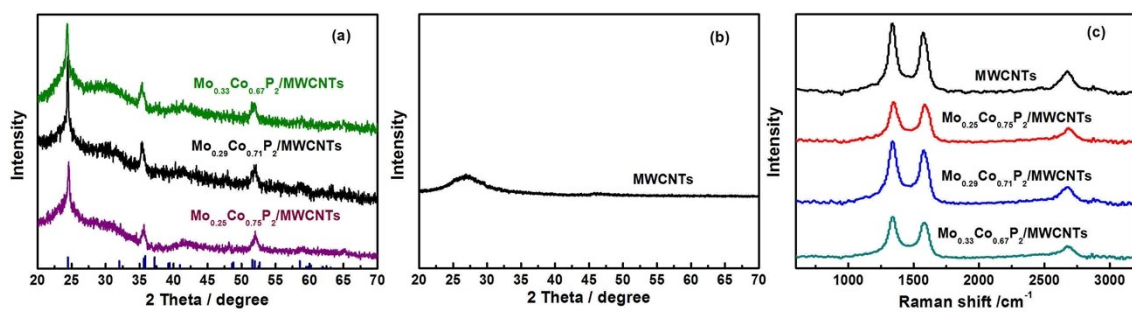

Figure S1. (a, b) XRD patterns and (c) Raman spectra of the as-prepared samples.

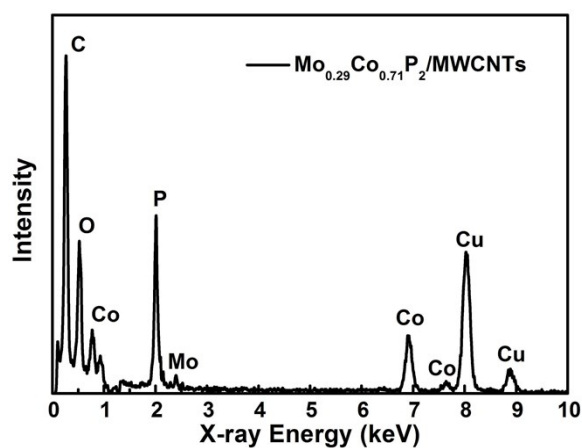

Figure S2. Energy-dispersive X-ray image of  $\text{Mo}_{0.29}\text{Co}_{0.71}\text{P}_2/\text{MWCNTs}$ .

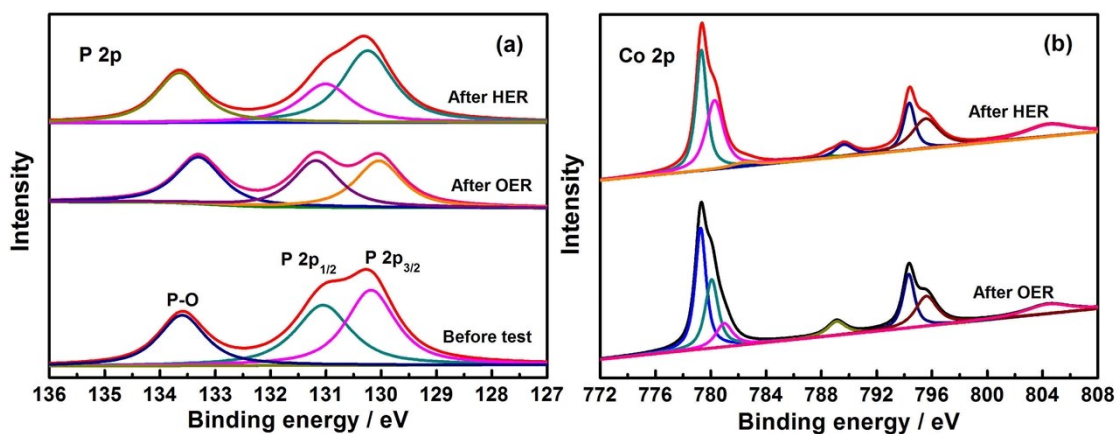

Figure S3. XPS spectra of  $\text{Mo}_{0.29}\text{Co}_{0.71}\text{P}_2/\text{MWCNTs}$  before and after HER and OER test: (a) P 2p and (b) Co 2p.

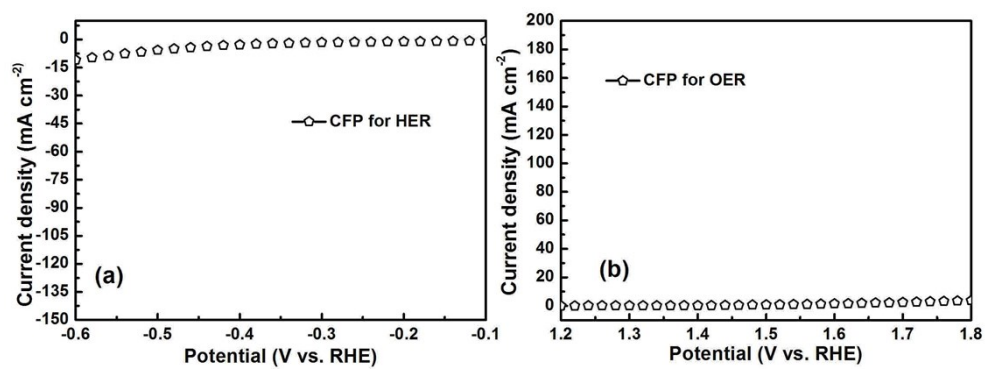

Figure S4. Polarization curves of (a) HER and (b) OER for pure CFP.

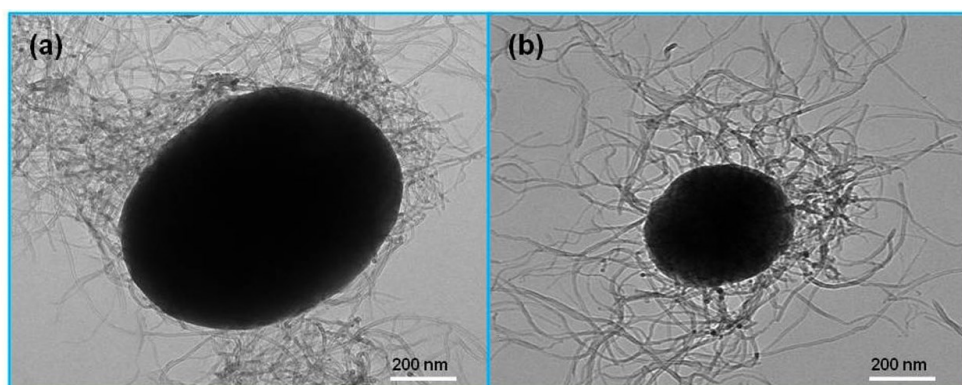

Figure S5. TEM images of Mo<sub>0.29</sub>Co<sub>0.71</sub>P<sub>2</sub>/MWCNTs after (a) HER and (b) OER test.

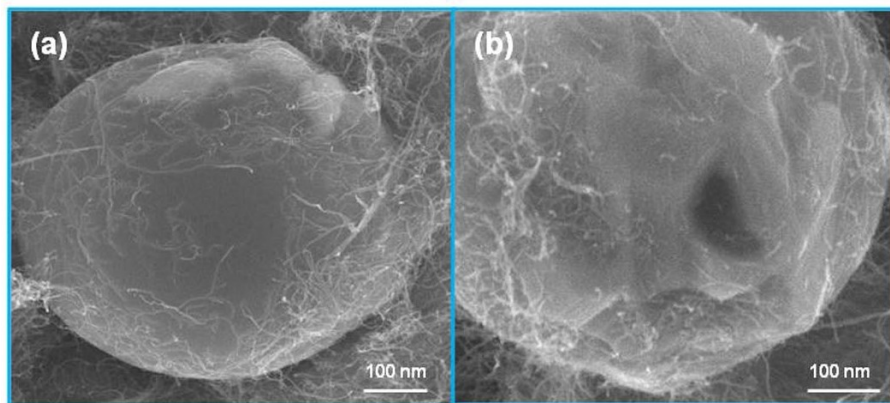

Figure S6. SEM images of Mo<sub>0.29</sub>Co<sub>0.71</sub>P<sub>2</sub>/MWCNTs after (a) HER and (b) OER test.

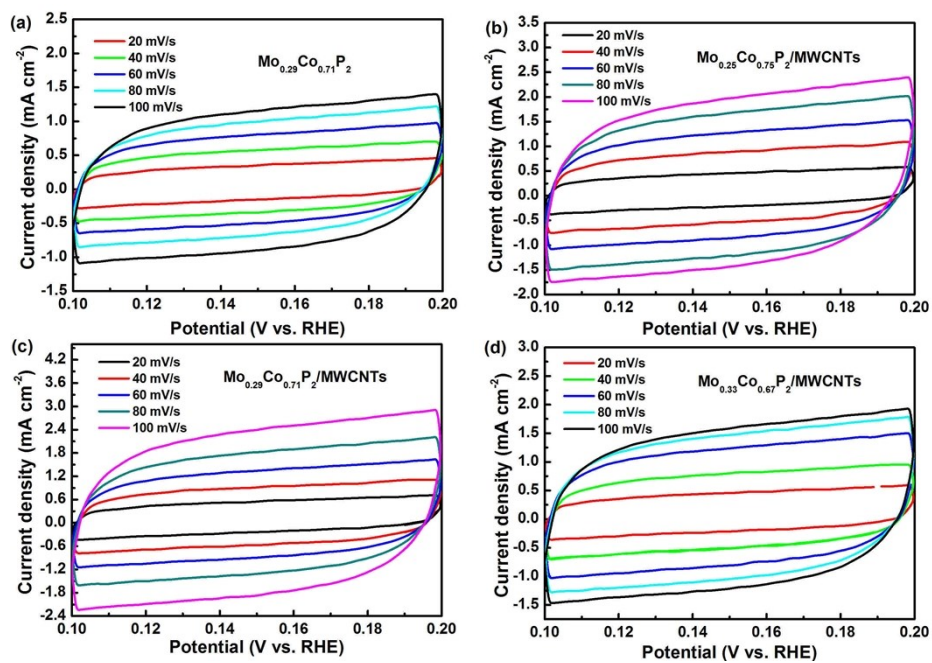

Figure S7. CV curves of the as-prepared samples measured from 20 to 100 mV/s in the non-Faradic region.

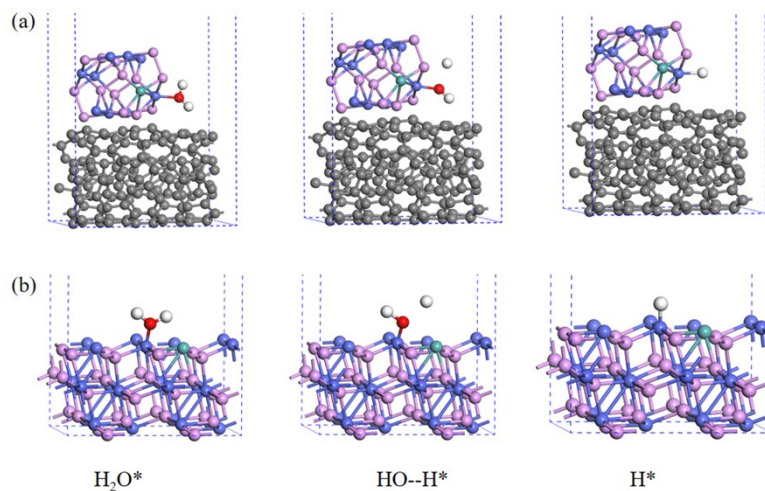

Figure S8. DFT-optimized structures of (a)  $\text{Mo}_{0.29}\text{Co}_{0.71}\text{P}_2/\text{MWCNTs}$  and (b)  $\text{Mo}_{0.29}\text{Co}_{0.71}\text{P}_2$  for HER process.

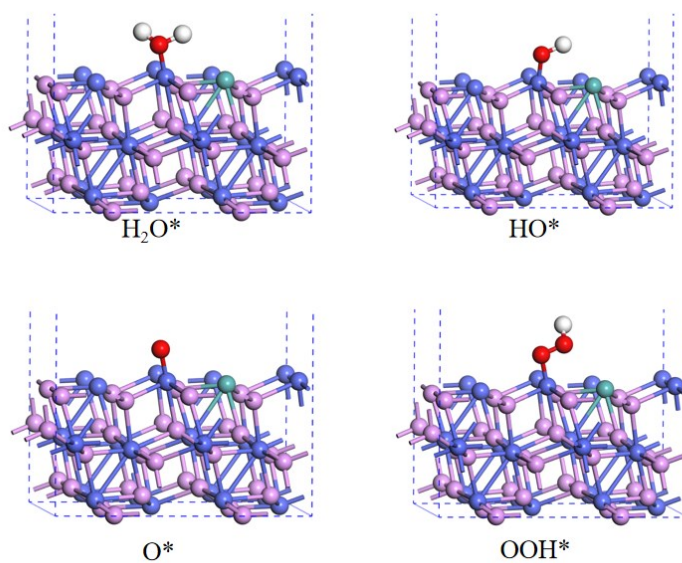

Figure S9. DFT-optimized structures of  $\text{Mo}_{0.29}\text{Co}_{0.71}\text{P}_2$  for OER process.

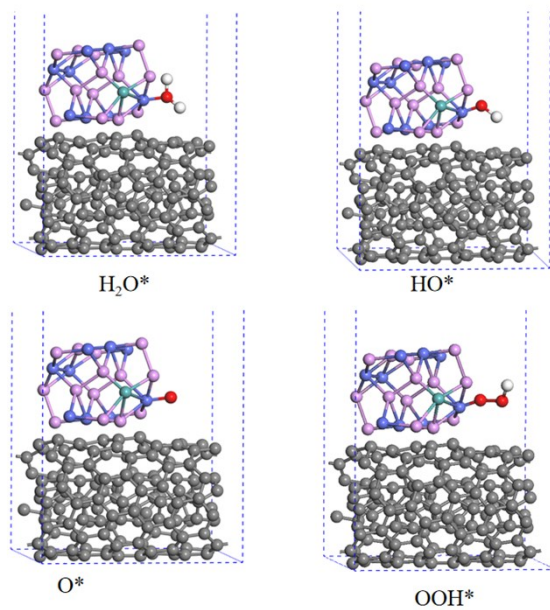

Figure S10. DFT-optimized structures of  $\text{Mo}_{0.29}\text{Co}_{0.71}\text{P}_2/\text{MWCNTs}$  for OER process.

**Table S1.** Comparison of HER performance of  $\text{Mo}_{0.29}\text{Co}_{0.71}\text{P}_2/\text{MWCNTs}$  with some other reported electrocatalysts in alkaline electrolyte.

| Electrocatalysts                                              | Overpotential (mV@10 mA cm <sup>-2</sup> ) | Ref.             |
|---------------------------------------------------------------|--------------------------------------------|------------------|
| CoP <sub>3</sub> /CoMoP-5/NF                                  | 110                                        | 5                |
| NiCoP/rGO                                                     | 209                                        | 6                |
| Cu <sub>0.3</sub> Co <sub>2.7</sub> P/NC                      | 220                                        | 7                |
| NiCoN/C nanocages                                             | 103                                        | 8                |
| Co <sub>2</sub> P/CNT-900                                     | 132                                        | 9                |
| Ni-Mo/Cu nanowires                                            | 107                                        | 10               |
| MoP/Ni <sub>2</sub> P                                         | 100.2                                      | 11               |
| Co <sub>2</sub> P/Co- Foil                                    | 112                                        | 12               |
| Co <sub>2</sub> P@N, P-PCN/CNTs                               | 154                                        | 13               |
| CoP/NCNHP                                                     | 115                                        | 14               |
| S:Co <sub>2</sub> P NPs                                       | 184                                        | 15               |
| Co/CoP-HNC                                                    | 180                                        | 16               |
| <b>Mo<sub>0.29</sub>Co<sub>0.71</sub>P<sub>2</sub>/MWCNTs</b> | <b>84</b>                                  | <b>This work</b> |

**Table S2.** Comparison of OER performance of  $\text{Mo}_{0.29}\text{Co}_{0.71}\text{P}_2/\text{MWCNTs}$  with other reported electrocatalysts in alkaline electrolyte.

| Electrocatalysts                                              | Overpotential (mV@10 mA cm <sup>-2</sup> ) | Ref.             |
|---------------------------------------------------------------|--------------------------------------------|------------------|
| R-CoP <sub>x</sub> /rGO(O)                                    | 268                                        | 17               |
| Co/CoP                                                        | 283                                        | 18               |
| NiCoP/C                                                       | 330                                        | 19               |
| MoS <sub>2</sub> -Co <sub>9</sub> S <sub>8</sub> -NC          | 230                                        | 20               |
| CoMnP nanoparticles                                           | 330                                        | 21               |
| NiCoP                                                         | 280                                        | 22               |
| CoP <sub>x</sub> /N-doped carbon                              | 319                                        | 23               |
| Co <sub>2</sub> P-Co <sub>3</sub> O <sub>4</sub>              | 265 (20 mA cm <sup>-2</sup> )              | 24               |
| NiCoP films                                                   | 360                                        | 25               |
| NiFe/ Co <sub>9</sub> S <sub>8</sub> /Carbon Cloth            | 219                                        | 26               |
| Co@Co <sub>9</sub> S <sub>8</sub>                             | 285                                        | 27               |
| CoFe <sub>2</sub> O <sub>4</sub> @NF                          | 250                                        | 28               |
| <b>Mo<sub>0.29</sub>Co<sub>0.71</sub>P<sub>2</sub>/MWCNTs</b> | <b>220</b>                                 | <b>This work</b> |

**Table S3.** The fitting results of EIS spectra.

| Sample                                                     | $R_s$ ( $\Omega$ ) | $R_{ct}$ ( $\Omega$ ) | CPE   | n    |
|------------------------------------------------------------|--------------------|-----------------------|-------|------|
| $\text{Mo}_{0.29}\text{Co}_{0.71}\text{P}_2$               | 4.52               | 30.94                 | 0.015 | 0.73 |
| $\text{Mo}_{0.25}\text{Co}_{0.75}\text{P}_2/\text{MWCNTs}$ | 2.61               | 4.56                  | 0.011 | 0.78 |
| $\text{Mo}_{0.29}\text{Co}_{0.71}\text{P}_2/\text{MWCNTs}$ | 2.41               | 3.24                  | 0.010 | 0.91 |
| $\text{Mo}_{0.33}\text{Co}_{0.67}\text{P}_2/\text{MWCNTs}$ | 2.49               | 6.98                  | 0.013 | 0.98 |

**Table S4.** Comparison of the overall water splitting performance of  $\text{Mo}_{0.29}\text{Co}_{0.71}\text{P}_2/\text{MWCNTs}$  with other reported electrocatalysts in alkaline electrolyte.

| Electrocatalysts                                                             | Cell voltage ( $\text{V}@10 \text{ mA cm}^{-2}$ ) | Ref.             |
|------------------------------------------------------------------------------|---------------------------------------------------|------------------|
| $\text{Ni}_{0.3}\text{Co}_{0.7}\text{-9AC-AD}$                               | 1.56                                              | 29               |
| $\text{Ni}_2\text{Cr}_1 \text{ LDH NSA}$                                     | 1.55                                              | 30               |
| $\text{NiCoP@NC}$                                                            | 1.59                                              | 31               |
| Holey $\text{NiCoP NS}$                                                      | 1.56                                              | 32               |
| $\text{CoP@3D MXene}$                                                        | 1.58                                              | 33               |
| $\text{Co/CoP-HNC}$                                                          | 1.68                                              | 16               |
| $\text{NiCoP/CC}$                                                            | 1.52                                              | 34               |
| $\text{CoP/NC-CNT}$                                                          | 1.63                                              | 35               |
| Oxidized $\text{CoP}$                                                        | 1.59                                              | 36               |
| $\text{MoP/Ni}_2\text{P}$                                                    | 1.55                                              | 11               |
| $\text{NiCoP}$                                                               | 1.58                                              | 22               |
| $\text{CoP@NPCSs}$                                                           | 1.64                                              | 37               |
| $\text{CoP/NCNHP}$                                                           | 1.64                                              | 14               |
| $\text{Fe-CoP/Ti}$                                                           | 1.60                                              | 38               |
| Mo-doped $\text{CoP}$                                                        | 1.57                                              | 39               |
| <b><math>\text{Mo}_{0.29}\text{Co}_{0.71}\text{P}_2/\text{MWCNTs}</math></b> | <b>1.48</b>                                       | <b>This work</b> |

## References

- [1] Perdew J P, Burke K, Ernzerhof M. Generalized gradient approximation made simple. Phys. Rev. Lett. 1996, 77(18): 3865-3868.
- [2] Kresse G, Joubert D P. From ultrasoft pseudopotentials to the projector augmented-wave method. Phys. Rev. B, 1999, 59(3): 1758-1775.
- [3] Monkhorst H J, Pack J D. Special points for Brillouin-zone integrations. Phys. Rev. B, 1976, 13(12): 5188-5192.

- [4] Gong L L, Zhang D T, Lin C Y, Zhu Y H, Shen Y, Zhang J, Han X, Zhang L P, Xia Z H. Catalytic mechanisms and design principles for single-atom catalysts in highly efficient CO<sub>2</sub> conversion. *Adv. Energy Mater.* 2019, 9(44): 1902625.
- [5] Jiang D L, Xu Y, Yang R, Li D, Meng S C, Chen M. CoP<sub>3</sub>/CoMoP heterogeneous nanosheet arrays as robust electrocatalyst for pH-universal hydrogen evolution reaction. *ACS Sustain. Chem. Eng.*, 2019, 7(10): 9309-9317.
- [6] Li J Y, Yan M, Zhou X M, Huang Z Q, Xia Z M, Chang C R, Ma Y Y, Qu Y Q. Mechanistic insights on ternary Ni<sub>2-x</sub>Co<sub>x</sub>P for hydrogen evolution and their hybrids with graphene as highly efficient and robust catalysts for overall water splitting. *Adv. Funct. Mater.*, 2016, 26(37): 6785-6796.
- [7] Song J H, Zhu C Z, Xu B Z, Fu S F, Engelhard M H, Ye R F, Du D, Beckman S P, Lin Y H. Bimetallic cobalt-based phosphide zeolitic imidazolate framework: CoP<sub>x</sub> hase-dependent electrical conductivity and hydrogen atom adsorption energy for efficient overall water splitting. *Adv. Energy Mater.* 2017, 7, 1601555.
- [8] Lai, J, Huang B, Chao Y, Chen X, Guo S. Strongly coupled nickel-cobalt nitrides/carbon hybrid nanocages with Pt-like activity for hydrogen evolution catalysis. *Adv. Mater.* 2019, 31, 1805541.
- [9] Das D, Nanda K K. One-step, integrated fabrication of Co<sub>2</sub>P nanoparticles encapsulated N, P dual-doped CNTs for highly advanced total water splitting. *Nano Energy*, 2016: 303-311.
- [10] Zhao S N, Huang J F, Liu Y Y, Shen J H, Wang H, Yang X L, Zhu Y H, Li C Z. Multimetallic Ni-Mo/Cu nanowires as nonprecious and efficient full water splitting catalys. *J. Mater. Chem. A*, 2017, 5(8): 4207-4214.
- [11] Du C C, Shang M X, Mao J X, Song W B. Hierarchical MoP/Ni<sub>2</sub>P heterostructures on nickel foam for efficient water splitting. *J. Mater. Chem. A*, 2017, 5(30): 15940-15949.
- [12] Yuan C Z, Zhong S L, Jiang Y F, Yang Z K, Zhao Z W, Zhao S J, Jiang N, Xu A W. Direct growth of cobalt-rich cobalt phosphide catalysts on cobalt foil: an efficient and self-supported bifunctional electrode for overall water splitting in alkaline media. *J. Mater. Chem. A*, 2017, 5(21): 10561-10566.
- [13] Li X Z, Fang Y Y, Li F, Tian M, Long X F, Jin J, Ma J T. Ultrafine Co<sub>2</sub>P nanoparticles encapsulated in nitrogen and phosphorus dual-doped porous carbon nanosheet/carbon nanotube hybrids: high-performance bifunctional electrocatalysts for overall water splitting. *J. Mater. Chem. A*, 2016, 4(40): 15501-15510.
- [14] Pan Y, Sun K, Liu S, Cao X, Wu K, Cheong W C, Chen Z, Wang Y, Li Y, Liu Y, Wang D, Peng Q, Chen C, Li Y. Core-shell ZIF-8@ZIF-67-derived CoP nanoparticle-

- embedded N-doped carbon nanotube hollow polyhedron for efficient overall water splitting. *J. Am. Chem. Soc.*, 2018, 140(7): 2610-2618.
- [15] Anjum M A R, Bhatt M D, Lee M H, Lee J S. Sulfur-doped dicobalt phosphide outperforming precious metals as a bifunctional electrocatalyst for alkaline water electrolysis. *Chem. Mater.*, 2018, 30(24): 8861-8870.
- [16] Hao Y C, Xu Y Q, Liu W, Sun X M. Co/CoP embedded in a hairy nitrogen-doped carbon polyhedron as an advanced tri-functional electrocatalyst. *Mater. Horiz.*, 2018, 5(1): 108-115.
- [17] Zhou X C, Gao H, Wang Y F, Liu Z, Lin J Q, Ding Y. P vacancies-enriched 3D hierarchical reduced cobalt phosphide as a precursor template for defect engineering for efficient water oxidation. *J. Mater. Chem. A*, 2018, 6(30): 14939-14948.
- [18] Xue Z H, Su H, Yu Q Y, Zhang B, Wang H H, Li X H, Chen J S. Janus Co/CoP nanoparticles as efficient Mott–Schottky electrocatalysts for overall water splitting in wide pH range. *Adv. Energy Mater.*, 2017, 7(12): 1602355.
- [19] He P L, Yu X Y, Lo X W. Carbon-incorporated nickel-cobalt mixed metal phosphide nanoboxes with enhanced electrocatalytic activity for oxygen evolution. *Angew. Chem.* 2017, 129, 3955-3958.
- [20] Huang N, Yan S F, Zhang M Y, Ding Y Y, Yang L, Sun P P, Sun X H. A MoS<sub>2</sub>-Co<sub>9</sub>S<sub>8</sub>-NC heterostructure as an efficient bifunctional electrocatalyst towards hydrogen and oxygen evolution reaction. *Electrochim. Acta*, 2019, 327: 134942.
- [21] Li D, Baydoun H, Verani C N, Brock S L. Efficient water oxidation using CoMnP nanoparticles. *J. Am. Chem. Soc.*, 2016, 138(12): 4006-4009.
- [22] Liang H, Gandi A N, Anjum D H, Wang X, Schwingenschlogl U, Alshareef H N. Plasma-assisted synthesis of NiCoP for efficient overall water splitting. *Nano Lett.*, 2016, 16(12): 7718-7725.
- [23] You B, Jiang N, Sheng M L, Gul S, Yano J, Sun Y J, . High-performance overall water splitting electrocatalysts derived from cobalt-based metal–organic frameworks. *Chem. Mater.*, 2015, 27(22): 7636-7642.
- [24] Yu X T, Wang M Y, Gong X Z, Guo Z C, Wang Z, Jiao S Q, Self-supporting porous CoP-based films with phase-separation structure for ultrastable overall water electrolysis at large current density, *Adv. Energy Mater.* 2018, 8: 1802445.
- [25] Jothi V R, Bose R, Rajan H, Jung C Y, Yi S C. Harvesting electronic waste for the development of highly efficient eco-design electrodes for electrocatalytic water splitting. *Adv. Energy Mater.*, 2018, 8(34): 1802615.

- [26] Zhan C H, Liu Z, Zhou Y, Guo M L, Zhang X L, Tu J C, Ding L, Cao Y. Triple hierarchy and double synergies of NiFe/Co<sub>9</sub>S<sub>8</sub>/carbon cloth: a new and efficient electrocatalyst for the oxygen evolution reaction. *Nanoscale*, 2019, 11(7): 3378-3385.
- [27] Yuan X, Yin J, Liu Z, Wang X, Dong C, Dong W, Riaz M S, Zhang Z, Chen M Y, Huang F. Charge transfer promoted high oxygen evolution activity of Co@Co<sub>9</sub>S<sub>8</sub> core-shell nanochains. *ACS Appl. Mater. Interf.*, 2018, 10(14): 11565-11571.
- [28] Urbain F, Du R F, Tang P Y, Smirnov V, Andreu T, Finger F, Divins N J, Llores J, Arbiol J, Cabot A, Morante J R. Upscaling high activity oxygen evolution catalysts based on CoFe<sub>2</sub>O<sub>4</sub> nanoparticles supported on nickel foam for power-to-gas electrochemical conversion with energy efficiencies above 80%. *Appl. Catal. B-Environ.*, 2019, 259: 118055.
- [29] Ye W, Yang Y S, Fang X Y, Arif M, Chen X B, Yan D P. 2D cocrystallized metal-organic nanosheet array as an efficient and stable bifunctional electrocatalyst for overall water splitting. *ACS Sustain. Chem. Eng.*, 2019, 7(21): 18085-18092.
- [30] Ye W, Fang X Y, Chen X B, Yan D P. A three-dimensional nickel–chromium layered double hydroxide micro/nanosheet array as an efficient and stable bifunctional electrocatalyst for overall water splitting. *Nanoscale*, 2018, 10(41): 19484-19491.
- [31] Yan L T, Cao L, Dai P C, Gu X, Liu D D, Li L J, Wang Y, Zhao X B. Metal-organic frameworks derived nanotube of nickel–cobalt bimetal phosphides as highly efficient electrocatalysts for overall water splitting. *Adv. Funct. Mater.*, 2017, 27(40): 1703455
- [32] Fang Z W, Peng L L, Qian Y M, Zhang X, Xie Y J, Cha J J, Yu G H. Dual Tuning of Ni-Co-A (A = P, Se, O) nanosheets by anion substitution and hole engineering for efficient hydrogen evolution. *J. Am. Chem. Soc.*, 2018, 140(15): 5241-5247.
- [33] Xiu L Y, Wang Z Y, Yu M Z, Qiu J S. Aggregation-resistant 3D MXene-based architecture as efficient bifunctional electrocatalyst for overall water splitting. *ACS Nano*, 2018, 12(8): 8017-8028.
- [34] Du C, Yang L, Yang F L, Cheng G Z, Luo W. Nest-like NiCoP for highly efficient overall water splitting. *ACS Catalysis*, 2017, 7(6): 4131-4137.
- [35] Guan C, Wu H J, Ren W N, Yang C H, Liu X M, Ouyang X F, Song Z Y, Zhang Y Z, Pennycook S J, Cheng C W, Wang J. Metal-organic framework-derived integrated nanoarrays for overall water splitting. *J. Mater. Chem. A*, 2018, 6(19): 9009-9018.
- [36] Chang J F, Xiao Y, Xiao M L, Ge J J, Liu C P, Xing W. Surface oxidized cobalt-phosphide nanorods as an advanced oxygen evolution catalyst in alkaline solution. *ACS Catal.*, 2015, 5(11): 6874-6878.

- [37] Wu K L, Chen Z, Cheong W C, Liu S J, Zhu W, Cao X, Sun K A, Lin Y, Zheng L R, Yan W S, Pan Y, Wang D S, Peng Q, Chen C, Li Y D. Toward bifunctional overall water splitting electrocatalyst: General preparation of transition metal phosphide nanoparticles decorated N-doped porous carbon spheres. *ACS Appl. Mater. Interf.*, 2018, 10(51): 44201-44208.
- [38] Tang C, Zhang R, Lu W, He L, Jiang X, Asiri A M, Sun X. Fe-doped CoP nanoarray: A monolithic multifunctional catalyst for highly efficient hydrogen generation, *Adv. Mater.* 2017, 29,1602441.
- [39] Guan C, Xiao W, Wu H J, Liu X M, Zang W J, Zhang H, Ding J, Feng Y P, Pennycook S J, Wang J. Hollow Mo-doped CoP nanoarrays for efficient overall water splitting. *Nano Energy*, 2018: 73-80.
